# Supplementary material for: Class III β-Tubulin Overexpression Induces Chemoresistance to Eribulin in a Leiomyosarcoma Cell Line
Source: Hindawi journal article supplement (doi:10.1155/2018/8987568), 2018-06-21

Supplementary Fig. 1

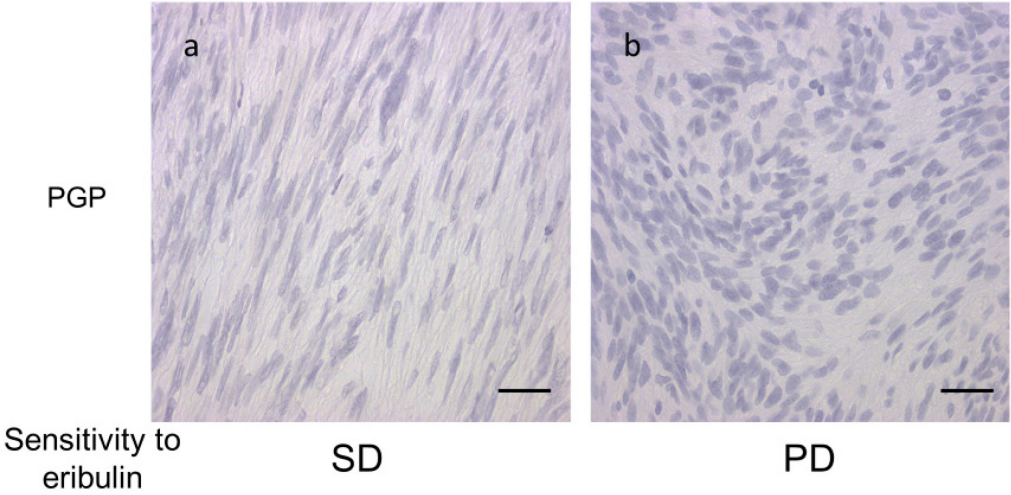

Supplement: f1 [file 8987568.f1.pdf]
